# Supplementary material for: Identification of QTL associated with resistance to Phytophthora fruit rot in cucumber (Cucumis sativus L.)
Source: Front Plant Sci. 2023 Nov 15;14:1281755. doi: 10.3389/fpls.2023.1281755 (PMC10693349; doi:10.3389/fpls.2023.1281755)
Supplement: Supplementary file 2 [file Table_1.xlsx]

## Sheet: Table_S1
Suppemtary Table S1. List of cucumber core collection accessions used in GWAS and XP-GWAS analyses. The accessions in extreme bulks for XP-GWAS analysis were highlighted in green (resistant), yellow (susceptible), and gray (random)
AM	Accession	Name	Origin	Region	Disease Score (BLUEs)	Bulk
AM001	WI2757	WI 2757	United States	North America	5.97809
AM004	NSL 28183	Midget	United States	North America	5.96446
AM005	NC 76	NC 76	United States	North America	6.01625
AM006	NSL 106620	True Lemon	United States	North America	7.32972
AM007	NSL 57124	Crystal Apple	United States	North America	6.466
AM016	Poinsett 76	Poinsett 76	United States	North America	6.67502	Random
AM021	NSL 1622	Earliest of All	United States	North America	6.64893
AM023	NSL 182005	Addis	United States	North America	6.60475
AM025	Gy14DH	Gy14DH	United States	North America	5.72827
AM026	H19	Arakansas Littleleaf	United States	North America	4.74338	Random
AM027	PI 561148	Marketmore 76	United States	North America	5.91159	Random
AM028	NSL 67882	SMR 18	United States	North America	5.89141
AM029	NSL 5764	Straight 8	United States	North America	5.74511
AM030	NSL 73125	Tablegreen 66	United States	North America	6.63121
AM031	PI 321011	TMG-1	Taiwan	East Asia	6.09303
AM032	PI 105340	Kuai Huang Kwa	China	East Asia	4.44191	Resistant
AM033	PI 109484	T 403	Turkey	Turkey	7.39929	Susceptible
AM034	PI 135122	Apple Shape	New Zealand	Other	6.3853
AM035	PI 137844	Khiyar	Iran	Central/West Asia	7.72001
AM036	PI 137847	Khiyar	Iran	Central/West Asia	8.17761
AM037	PI 137851	5664	Iran	Central/West Asia	7.05679	Susceptible
AM038	PI 163213	Khira	India	India/South Asia	6.50013
AM039	PI 163216	8307	Pakistan	India/South Asia	4.44092	Resistant
AM040	PI 163217	Khira	Pakistan	India/South Asia	3.21658	Resistant
AM042	PI 163223	Kakri	Pakistan	India/South Asia	5.23994
AM043	PI 164465	Kakri	India	India/South Asia	6.14225
AM045	PI 164734	9162	India	India/South Asia	5.29563
AM046	PI 167223	Hiyar	Turkey	Turkey	4.09832
AM047	PI 169391	2861	Turkey	Turkey	6.43613
AM048	PI 169393	2965	Turkey	Turkey	5.27876
AM049	PI 169397	3573	Turkey	Turkey	5.58682
AM050	PI 171608	6900	Turkey	Turkey	4.85805
AM051	PI 171613	7125	Turkey	Turkey	7.01637	Susceptible
AM052	PI 173889	Hanzil	India	India/South Asia	6.60367	Susceptible
AM054	PI 174166	8273	Turkey	Turkey	7.07605
AM055	PI 175688	6049	Turkey	Turkey	5.45655
AM056	PI 175689	6195	Turkey	Turkey	5.81073
AM057	PI 176519	9198	Turkey	Turkey	6.38824
AM058	PI 176523	9440	Turkey	Turkey	6.16253
AM059	PI 178888	9693	Turkey	Turkey	6.75554
AM060	PI 179676	Kakri	India	India/South Asia	5.62063
AM061	PI 179678	No. 11441	India	India/South Asia	7.52334	Susceptible
AM062	PI 181755	9946	Lebanon	Central/West Asia	6.22165
AM063	PI 181874	Aleppo 6	Syria	Central/West Asia	6.31925	Susceptible
AM064	PI 183056	Kakri	India	India/South Asia	4.58718	Resistant
AM065	PI 183224	5	Egypt	Africa	5.54193	Random
AM067	PI 197085	11762	India	India/South Asia	7.32196	Susceptible
AM068	PI 197086	11758	India	India/South Asia	7.46409	Susceptible
AM069	PI 197087	11757	India	India/South Asia	6.04482
AM070	PI 197088	11763	India	India/South Asia	6.54786
AM071	PI 200815	17	Myanmar	India/South Asia	5.39816	Resistant
AM072	PI 200818	94	Myanmar	India/South Asia	6.95194
AM073	PI 204568	203	Turkey	Turkey	5.58858
AM074	PI 205995	Muromsche	Sweden	Europe	4.43309	Resistant
AM075	PI 209069	OHIO 31	United States	North America	7.1319	Susceptible
AM076	PI 212233	Kurume Natuhusinari	Japan	East Asia	5.98616
AM077	PI 212599	13112	Afghanistan	Central/West Asia	6.18495
AM079	PI 220171	Khiar	Afghanistan	Central/West Asia	6.34553
AM080	PI 220791	Khiar; Badrang	Afghanistan	Central/West Asia	7.12278	Susceptible
AM081	PI 222985	Khiar	Iran	Central/West Asia	5.15972
AM082	PI 229808	55-64	Canada	North America	6.63683
AM083	PI 234517	SC50	United States	North America	5.63435
AM084	PI 249561	Teang-guar	Thailand	India/South Asia	6.55335
AM085	PI 249562	Teang-rhan	Thailand	India/South Asia	4.72473	Resistant
AM087	PI 257286	AM087	Spain	Europe	6.8789
AM088	PI 257487	Water Cucumber	China	East Asia	4.92292	Random
AM089	PI 261608	Pepino Medio Largo Verde	Spain	Europe	6.29482
AM090	PI 263047	Altaisky Ranny	Russian Federation	Europe	6.00612
AM091	PI 263079	Nerosimy 40 (Nerosimye 40)	Russian Federation	Europe	5.36931
AM092	PI 263080	Tiraspol'sky 234	Moldova	Europe	6.72849	Susceptible
AM093	PI 267742	Hong Kong N.T.	Hong Kong	East Asia	5.85706
AM094	PI 267743	Chinese Cucumber	Hong Kong	East Asia	6.84506	Random
AM095	PI 267745	Pepino Verde Paulistano	Brazil	Other	5.90839
AM096	PI 267746	Selection from PI 164816	India	India/South Asia	7.14055	Susceptible
AM098	PI 271327	Khira	India	India/South Asia	7.0114
AM099	PI 271328	Khira	India	India/South Asia	6.59634
AM100	PI 271331	Khira	India	India/South Asia	6.93411
AM101	PI 275410	Eminent Broei	Netherlands	Europe	5.82721
AM102	PI 277741	Green Spot Super	Netherlands	Europe	6.36931
AM103	PI 279464	Kaga Aonaga-fushinari	Japan	East Asia	4.87536	Random
AM104	PI 279465	Natsu-fushnari	Japan	East Asia	5.63127
AM106	PI 279468	Ochiai-Fushinari, Improved Strain II	Japan	East Asia	6.98083	Susceptible
AM108	PI 283899	Bilske Nakladacky	Czech Republic	Europe	5.96312
AM109	PI 285605	Monastyrski, Chodow	Poland	Europe	5.36511
AM110	PI 285606	Monastyrski, Freege	Poland	Europe	5.69712
AM111	PI 285607	Monastyrski, Ulrich	Poland	Europe	5.85115
AM112	PI 285608	Nochowski Szklarniowy	Poland	Europe	5.04722
AM113	PI 285610	Warszawski Inspektowy	Poland	Europe	6.0661
AM114	PI 288996	Kinai Kigyo	Hungary	Europe	5.11907
AM115	PI 289698	Richmond Green Apple	Australia	Other	6.3432
AM116	PI 292012	Hermaphrodite Cucumber	Israel	Central/West Asia	5.85427
AM117	PI 293923	PI 293923	Israel	Central/West Asia	6.64232
AM118	PI 296120	PI 296120	Egypt	Africa	5.83599
AM119	PI 306785	Armour	Canada	North America	6.44184
AM120	PI 308915	343	Russian Federation	Europe	6.32131
AM121	PI 314425	Nejinske	Georgia	Central/West Asia	6.84188	Susceptible
AM122	PI 321006	Fengyuan Green Skin	Taiwan	East Asia	6.94238
AM123	PI 321007	Improved Green Skin	Taiwan	East Asia	6.46695
AM124	PI 321009	Nanchi White Spine	Taiwan	East Asia	6.98814
AM125	PI 330628	Kshira	Pakistan	India/South Asia	7.56274	Susceptible
AM126	PI 342950	Spanberg Pickling	Denmark	Europe	5.21414
AM127	PI 344438	241	Iran	Central/West Asia	5.81446
AM128	PI 344442	Shiraz	Iran	Central/West Asia	6.68458
AM129	PI 344445	Abad Golfaigar	Iran	Central/West Asia	5.99498
AM130	PI 351140	Hermaphrodite 62	Soviet Union	Europe	7.04996
AM131	PI 354952	Rhinish Pickling 39/59 Hunderup S. 1964	Denmark	Europe	6.76239
AM132	PI 356809	HP 61	Soviet Union	Europe	6.00308
AM133	PI 356832	Spotresisting	Netherlands	Europe	6.32877
AM134	PI 357848	Vojnicka	Macedonia	Europe	4.91749
AM135	PI 357852	Srednoedra	Macedonia	Europe	6.00658	Random
AM136	PI 357863	Zelenikovska	Macedonia	Europe	4.26439	Resistant
AM137	PI 357867	Bitolska	Macedonia	Europe	4.72944	Resistant
AM138	PI 358813	PI 358813	Malaysia	India/South Asia	5.74678
AM139	PI 368558	Kusa	Macedonia	Europe	6.18716
AM140	PI 369717	PI 369717	Poland	Europe	6.97905	Random
AM141	PI 370019	Cu 68-01	India	India/South Asia	6.65879
AM142	PI 370643	1031	Russian Federation	Europe	6.6118
AM143	PI 372905	Femland	Netherlands	Europe	7.08767
AM144	PI 385967	Cool and Crisp	Kenya	Africa	6.52003	Random
AM145	PI 379282	Dolga	Macedonia	Europe	5.61541
AM146	PI 379285	Kornisoni	Macedonia	Europe	6.37064
AM147	PI 390240	Ao Fushinari (B)	Japan	East Asia	6.21629
AM148	PI 390243	Harigaya	Japan	East Asia	6.27021
AM149	PI 390245	Hyuga 2 Improved	Japan	East Asia	5.93856
AM150	PI 390247	Jin	Japan	East Asia	6.68872	Random
AM151	PI 390255	Nisshi Aonaga Fushinari	Japan	East Asia	6.01131
AM152	PI 390258	Sado Risshu	Japan	East Asia	5.40464	Random
AM153	PI 390267	Tokiwa (B)	Japan	East Asia	7.16175	Susceptible
AM154	PI 401734	PR 39	Puerto Rico	North America	5.94527
AM155	PI 406473	Niagara	Netherlands	Europe	5.88083
AM156	PI 414159	Lehua No. 1	United States	North America	4.50999	Resistant
AM157	PI 418963	151	China	East Asia	5.44511	Random
AM158	PI 418964	732	China	East Asia	5.15474
AM159	PI 419182	Shanghai Cucumber	China	East Asia	6.70346	Random
AM160	PI 422180	Hyclos Mix	Netherlands	Europe	6.07434
AM161	PI 422181	Jedinecna	Czech Republic	Europe	6.58969	Random
AM162	PI 422182	Kobus Mix	Netherlands	Europe	5.13946	Random
AM164	PI 426169	UPL-Cu-1	Philippines	India/South Asia	4.06223	Resistant
AM165	PI 426170	UPL-Cu-2	Philippines	India/South Asia	5.83726
AM166	PI 432850	896 F1	China	East Asia	5.7629
AM167	PI 432855	314 F1	China	East Asia	4.50188	Resistant
AM168	PI 432864	I yu chieh cheng	Japan	East Asia	5.5178
AM169	PI 432865	Kuan chi chiao pai hasia chiu No. 1	Japan	East Asia	6.5223
AM170	PI 432867	Sui qing	China	East Asia	6.64202
AM171	PI 432869	Shanghai	China	East Asia	6.03555	Random
AM172	PI 432870	Ye er sau	China	East Asia	6.22572	Random
AM173	PI 432874	San dong si gua 52	China	East Asia	6.26767
AM174	PI 432875	San dong si gua 101	China	East Asia	5.94943
AM175	PI 432877	San dong si gua 507	China	East Asia	6.25418
AM176	PI 432882	San dong si gua	China	East Asia	6.48182
AM177	PI 432886	San dong si gua 7156	China	East Asia	6.20057
AM178	PI 432892	Si gua qing 5896	China	East Asia	4.58689	Resistant
AM179	PI 435947	Parad	Soviet Union	Europe	6.81502
AM180	PI 458855	Cu 3-3	Russian Federation	Europe	5.31436
AM181	PI 466922	M-2C	Russian Federation	Europe	5.31293
AM182	PI 470254	DB 1	Indonesia	India/South Asia	6.05104
AM183	PI 478367	O 52	China	East Asia	6.92416
AM184	PI 481612	Kenchu	Bhutan	India/South Asia	7.16775	Susceptible
AM185	PI 481614	Gagon	Bhutan	India/South Asia	3.9565	Resistant
AM186	PI 481617	457	Bhutan	India/South Asia	5.36316
AM187	PI 482464	TGR 1785	Zimbabwe	Africa	5.76119
AM188	PI 483340	H. N. Semiwhite F1	Korea, South	East Asia	5.15421
AM189	PI 483344	Sunghweon F1	Korea, South	East Asia	6.13224
AM190	PI 489754	Wen Shang	China	East Asia	5.80933
AM193	PI 502331	AR 236	Uzbekistan	Central/West Asia	6.22027
AM195	PI 508453	Hungnong Semiwhite	Korea, South	East Asia	6.19293
AM196	PI 508456	Tender Green	Korea, South	East Asia	5.83602
AM197	PI 525075	Concombre blanc	Mauritius	Africa	6.22835
AM198	PI 531313	Kecskemeti Livme	Hungary	Europe	7.65958	Susceptible
AM199	PI 605924	USM 250	India	India/South Asia	7.27434	Susceptible
AM200	PI 605930	USM 265	India	India/South Asia	6.63725
AM201	PI 605933	USM 268	India	India/South Asia	5.79094
AM202	PI 605996	KSM 436	India	India/South Asia	7.45512	Susceptible
AM204	PI 618937	Jin Chun No. 4	China	East Asia	5.77567
AM205	PI 618944	Yangzhou Ruhuanggu	China	East Asia	7.8723	Susceptible
AM206	NSL 82999	MSU 915	United States	North America	6.5712
AM210	NSL 5716	Boston Pickling	United States	North America	6.68897
AM211	Chipper	Chipper	United States	North America	5.91923
AM212	NSL 182006	Clinton	United States	North America	5.89725
AM215	PI 414157	Double Yield	United States	North America	7.01738
AM218	NSL 28175	Extra Early Majestic	United States	North America	6.61953
AM221	NSL 28178	Giant White	Germany	Europe	5.80836
AM224	NSL 5744	Minisota Dwarf	United States	North America	6.72643
AM225	PI 175686	6024	Turkey	Turkey	6.30996	Random
AM226	PI 192940	PI 192940	China	East Asia	6.01431
AM227	PI 177361	Hiyar	Turkey	Turkey	7.07189	Susceptible
AM228	PI 188749	Baladi	Egypt	Africa	6.18378
AM229	PI 205996	Vasteras Druv OE/45	Sweden	Europe	6.63453
AM230	PI 246930	Early Cucumber	Afghanistan	Central/West Asia	6.00805
AM231	PI 257486	Yi sang	China	East Asia	7.2077	Susceptible
AM232	PI 275411	Lange Groene Broei	Netherlands	Europe	5.90636
AM233	PI 283902	Znojemske Nakladacky	Czech Republic	Europe	6.25654
AM234	PI 342951	Pickling F1 No. 40	Denmark	Europe	6.62592
AM235	PI 390264	Kairyo-Shindome	Japan	East Asia	6.1367
AM236	PI 432858	759 F1	China	East Asia	6.07076
AM240	Spacemaster 80	Spacemaster 80	United States	North America	6.44642
AM246	NSL 28173	Danish Mustard	United States	North America	6.97827	Susceptible
AM247	NSL 5743	Model	United States	North America	5.86407
AM249	NSL 4807	MSU 713-5	United States	North America	5.99284
AM252	NSL 5721	Puerto Rico 10	Puerto Rico	North America	5.48406
AM253	NSL 5723	Puerto Rico 39	Puerto Rico	North America	6.78706	Random
AM255	NSL 5715	Ashley	United States	North America	5.6853
AM258	NSL 5746	National Pickling	United States	North America	6.53245
AM259	NSL 6567	Black Diamond	United States	North America	6.55262
AM262	PI 390253	Mogami	Japan	East Asia	7.39709	Susceptible
AM263	Ames 7745	Ohio MR17	United States	North America	6.33344
AM267	Ames 13333	Pepino	Spain	Europe	6.15737
AM269	Ivory Queen	Ivory Queen	United States	North America	6.50197
AM271	NSL 20151	Marketer	United States	North America	5.917
AM275	NSL 182007	Sumter	United States	North America	4.22895	Resistant
AM278	PI 508456	Tendergreen	Korea, South	East Asia	5.83602
AM280	NSL 197095	Wautoma	United States	North America	3.51948	Resistant
AM282	Vlaspik	Vlaspik	United States	North America	5.61896
AM285	PI 176954	Kol	Turkey	Turkey	5.49188	Random
AM287	PI 390244	Hyuga 2	Japan	East Asia	6.57426	Random
AM288	WI5551	WI 5551	United States	North America	5.2239	Random
AM301	PI 176953	9199	Turkey	Turkey	5.76919
AM302	PI 357838	Radoviska langa	Macedonia	Europe	5.71111
AM304	PI 174173	8424	Turkey	Turkey	6.16774
AM305	PI 390953	Kujliukskij	Uzbekistan	Central/West Asia	6.74955
AM306	PI 109483	T 475	Turkey	Turkey	5.29779
AM308	PI 169389	2689	Turkey	Turkey	5.28617	Random
AM309	PI 175679	5371	Turkey	Turkey	5.45867
AM311	PI 178884	Hiyar	Turkey	Turkey	4.36799	Resistant
AM312	PI 206425	700	Turkey	Turkey	5.83191
AM313	PI 214049	Sotikai	India	India/South Asia	4.00704	Resistant
AM314	PI 344434	217	Iran	Central/West Asia	6.40329
AM315	PI 357830	Dolga crna	Macedonia	Europe	6.0767
AM316	PI 368552	Sredno dolga	Macedonia	Europe	6.29685
AM317	PI 432896	Si 4758	China	East Asia	5.0602	Resistant
AM319	PI 532522	Sakata Kurosango	Japan	East Asia	5.65971
AM320	PI 605945	USM 309	India	India/South Asia	6.1185
AM321	PI 605947	USM 311	India	India/South Asia	3.90845
AM322	PI 605948	USM 312	India	India/South Asia	5.25138
AM323	PI 605979	USM 357	India	India/South Asia	6.5739	Random
AM324	PI 605981	USM 359	India	India/South Asia	4.7978
AM325	PI 605998	KSM 443	India	India/South Asia	5.48807
AM326	PI 606013	KSM 489	India	India/South Asia	5.70137	Random
AM327	PI 211983	10	Iran	Central/West Asia	6.18921
AM329	PI 419009	Lin-yang (Bristle)	China	East Asia	6.07341
AM330	PI 482463	TGR 1542	Zimbabwe	Africa	5.15239
AM331	PI 500360	Chibimbi	Zambia	Africa	6.71363
AM332	PI 500366	Chibimbi	Zambia	Africa	6.77185
AM333	NSL 26507	Pixie	United States	North America	6.02636
AM334	NSL 106639	Yomaki	United States	North America	6.13298
AM337	PI 321010	Nei Wu	Taiwan	East Asia	6.44788
AM338	PI 344435	230	Iran	Central/West Asia	5.59966
AM339	PI 390252	Mitani	Japan	East Asia	7.1388	Susceptible
AM340	PI 401732	L 2	Puerto Rico	North America	6.89652	Random
AM341	Ames 22385	Green Long	Nepal	India/South Asia	5.79633
AM352	PI 338236	Ames 1208	Turkey	Turkey	6.50013
AM370	PI 164743	Velleri	India	India/South Asia	5.2718	Resistant
AM371	PI 174167	8288	Turkey	Turkey	6.51533
AM372	PI 175697	9720	Turkey	Turkey	6.39321
AM373	PI 211984	11	Iran	Central/West Asia	6.584	Susceptible
AM374	PI 264666	Landgurken Delikaress	Germany	Europe	5.33251	Resistant
AM375	PI 264667	Landgurken Vorgegirgstrauben	Germany	Europe	6.59845
AM376	PI 285603	Delikates, Spojnia	Poland	Europe	6.41072
AM377	PI 357864	Brzak	Macedonia	Europe	4.6493	Resistant
AM378	PI 360939	Kora	Netherlands	Europe	6.16664
AM379	PI 368553	Dolgi langi	Macedonia	Europe	5.43252
AM380	PI 390257	Risshu (B)	Japan	East Asia	6.51694	Random
AM381	PI 418962	74-18	China	East Asia	5.39001
AM383	PI 466921	M-2	Russian Federation	Europe	5.1628	Random
AM386	PI 418989	no name	China	East Asia	6.08883
AM387	PI 419017	PI 419017	China	East Asia	5.45668
AM588	Ames 19221	Vitiaz	Ukraine	Europe	6.3043
AM589	Ames 22386	7032	Nepal	India/South Asia	6.30986
AM590	PI 105263	PI 105263	Turkey	Turkey	5.33366
AM591	PI 109481	T 530	Turkey	Turkey	5.22513
AM592	PI 113334	344 [34]	China	East Asia	6.09359
AM593	PI 114339	Manchuko Wonder	Japan	East Asia	4.89948	Resistant
AM594	PI 137848	Khiyar-i-balang	Iran	Central/West Asia	5.7791
AM595	PI 137857	Khiyar i sabz	Iran	Central/West Asia	4.71339
AM596	PI 163218	Khira	Pakistan	India/South Asia	5.24835
AM598	PI 164670	9095	India	India/South Asia	4.24919	Resistant
AM599	PI 165046	Hiyar	Turkey	Turkey	5.18632
AM600	PI 167358	Hiyar	Turkey	Turkey	4.51819
AM601	PI 169381	Cengerkoy	Turkey	Turkey	4.62305
AM602	PI 169395	3379	Turkey	Turkey	6.18208
AM603	PI 169396	3023	Turkey	Turkey	6.00041
AM604	PI 171605	6826	Turkey	Turkey	4.98708
AM605	PI 171607	Sivas	Turkey	Turkey	6.70916
AM606	PI 172838	Hiti	Turkey	Turkey	6.26124
AM607	PI 172841	7732	Turkey	Turkey	6.64458
AM608	PI 173674	7691	Turkey	Turkey	6.36839
AM609	PI 174172	8394	Turkey	Turkey	7.13803
AM610	PI 174177	Malatya	Turkey	Turkey	6.67429
AM611	PI 175111	Khira	India	India/South Asia	5.83846
AM612	PI 175691	9040	Turkey	Turkey	6.76779
AM613	PI 175695	Ucuk	Turkey	Turkey	7.15708
AM614	PI 176525	9539	Turkey	Turkey	4.87075
AM615	PI 176950	5672	Turkey	Turkey	5.89262
AM616	PI 179260	Istanbul	Turkey	Turkey	4.69874
AM618	PI 183677	Hiyar	Turkey	Turkey	6.32698
AM620	PI 211117	Beth Alpha	Israel	Central/West Asia	6.48763
AM621	PI 211728	12775	Afghanistan	Central/West Asia	6.78902
AM622	PI 212985	Khida	India	India/South Asia	7.39376
AM623	PI 220789	Khiar	Afghanistan	Central/West Asia	5.21817
AM624	PI 220860	Shogoin No. 1-48	Korea, South	East Asia	5.13393
AM625	PI 222243	1423	Iran	Central/West Asia	6.39874
AM627	PI 264227	Delicatess	France	Europe	7.29263
AM628	PI 267935	Tsuda-Sanjaku	Japan	East Asia	4.0205	Resistant
AM629	PI 269480	427	Pakistan	India/South Asia	8.44874
AM630	PI 271326	Khira	India	India/South Asia	5.11134
AM631	PI 271337	1744	India	India/South Asia	5.94874
AM632	PI 274902	Everyday	United Kingdom	Europe	6.52732
AM633	PI 279463	Chojitsu-ochiai, F1 Hybrid	Japan	East Asia	4.7972	Resistant
AM635	PI 284699	FAVOR II	Sweden	Europe	7.00894
AM636	PI 288332	223	India	India/South Asia	5.55291
AM637	PI 288994	Francia Furtos	Hungary	Europe	5.82369
AM638	PI 302443	Taipei No. 2 Hybrid	Taiwan	East Asia	6.41456
AM640	PI 319216	Balady	Egypt	Africa	5.47755
AM641	PI 339248	Langa	Turkey	Turkey	6.27741
AM642	PI 339250	Cengelkoy	Turkey	Turkey	5.95466
AM643	PI 344439	248	Iran	Central/West Asia	7.05374
AM644	PI 344444	Mevlankveh	Iran	Central/West Asia	5.43263
AM645	PI 351139	Hermaphrodite 61	Soviet Union	Europe	6.58763
AM646	PI 355052	Beit Alpha	Israel	Central/West Asia	6.78075
AM647	PI 357839	Crna langa	Macedonia	Europe	5.32468
AM648	PI 357840	Krusevska	Macedonia	Europe	5.82991
AM649	PI 357860	Probistijska	Macedonia	Europe	4.9043
AM650	PI 358814	PI 358814	Malaysia	India/South Asia	7.22991
AM651	PI 368548	Kusa	Macedonia	Europe	5.39211
AM652	PI 390238	Aodai	Japan	East Asia	5.61449	Resistant
AM653	PI 390239	Ao Fushinari (A)	Japan	East Asia	6.18208
AM654	PI 390241	Aonaga Jihai	Japan	East Asia	7.61179	Susceptible
AM655	PI 390246	Izumiharu (A)	Japan	East Asia	5.11657	Resistant
AM656	PI 390248	Kaga Aonaga Fushinari	Japan	East Asia	7.24237
AM657	PI 390259	Sagami Hanjiro (A)	Japan	East Asia	6.54241
AM658	PI 390260	Saitama Ochiai 4	Japan	East Asia	6.02602
AM659	PI 390266	Suyo (B)	Japan	East Asia	5.58666
AM660	PI 390268	Too Sanjaku	Japan	East Asia	7.84734	Susceptible
AM661	PI 390952	Din-zo-sn	Russian Federation	Europe	5.75541
AM662	PI 400270	Kyoto Three Feet	Japan	East Asia	7.08102
AM663	PI 401733	L 27	Puerto Rico	North America	4.76541
AM664	PI 422191	Plento	Netherlands	Europe	5.85685
AM665	PI 432857	802 F1	China	East Asia	6.81557
AM666	PI 432863	Ta ho shan chih 262	Japan	East Asia	5.65807
AM667	PI 432868	Quan qing	China	East Asia	5.95946
AM668	PI 432873	San dong si gua 22	China	East Asia	6.09718
AM669	PI 432876	San dong si gua 12	China	East Asia	6.8631
AM670	PI 432878	San dong si gua 127	China	East Asia	5.61764
AM671	PI 432879	San dong si gua 802	China	East Asia	6.2803
AM672	PI 432880	San dong si gua 5101	China	East Asia	5.37935
AM673	PI 432881	San dong si gua 103	China	East Asia	6.12109
AM674	PI 432885	San dong si gua 1210	China	East Asia	5.99388
AM675	PI 432890	Si gua qing 5805	China	East Asia	4.63582
AM676	PI 432893	Si gua qing 8540	China	East Asia	6.2879
AM677	PI 432894	Si gua qing 1611	China	East Asia	4.52553	Resistant
AM678	PI 435946	Konkurent	Soviet Union	Europe	6.00046
AM679	PI 436608	Tsin san x Yeh 124 F1	China	East Asia	5.75377
AM680	PI 436672	Autumn 1	China	East Asia	5.66402
AM681	PI 458847	Cu 1-3	Russian Federation	Europe	7.2938
AM682	PI 464873	PI 464873	China	East Asia	6.46791
AM683	PI 483342	Sayup	China	East Asia	4.99041
AM684	PI 487424	Jing Xu 1 hao	China	East Asia	4.99819
AM685	PI 489752	Jin yan No. 2	China	East Asia	5.60291
AM688	PI 532162	Ahsebe	Oman	Central/West Asia	8.45668
AM689	PI 534543	OA 292	Syria	Central/West Asia	5.83862
AM690	PI 535880	Mikor	Poland	Europe	7.12236
AM691	PI 540414	Margilansky 220	Uzbekistan	Central/West Asia	6.66958
AM692	PI 561147	Spartan Salad	United States	North America	6.31686
AM693	PI 605916	USM 123	India	India/South Asia	4.84927
AM697	PI 606011	KSM 486	India	India/South Asia	4.75479
AM700	PI 606048	Poinsettee	India	India/South Asia	6.88104
AM704	NSL 5753	Palmetto	United States	North America	6.6084
AM705	NSL 5754	Palomar	United States	North America	6.70139
AM706	NSL 22414	Polaris	United States	North America	5.25934
AM707	NSL 28191	Shamrock	United States	North America	5.69929

## Sheet: Table_S2
Suppemtary Table S2. KASP primer sequences and the location and ref/alt alleles of the targeted SNPs
Young fruit resistance (Chr5)
Marker	SNP (Gy/A4-3)	Location (bp) (Gy 2.0)	Location (bp) (Gy v2.1)	Forward Primer 1	Forward Primer 2	Reverse Primer
M1	A/C	24951991	24912355	GAAGGTGACCAAGTTCATGCTATCGAAGACCCCTCACTACCGTACTA	GAAGGTCGGAGTCAACGGATTATCGAAGACCCCTCACTACCGTACTC	CTTCAGTAGGTTGACGATGCGACA
M2	G/A	25172406	25132826	GAAGGTGACCAAGTTCATGCTGAGTTGATGGCATCAGATTTCAGAAG	GAAGGTCGGAGTCAACGGATTGAGTTGATGGCATCAGATTTCAGAAA	TGGTTTGGTTGGATCTTTCCT
M3	A/G	26574038	26534891	GAAGGTGACCAAGTTCATGCTCCTTATTACCGATGAAGAGATGCAA	GAAGGTCGGAGTCAACGGATTCCTTATTACCGATGAAGAGATGCAG	AAGGCCCAAATCACTTTCTTCTTCTTC
M5	A/G	28395739	28357049	GAAGGTGACCAAGTTCATGCTATTTCGAAGGCTTGCATCTTCTCTCCGCA	GAAGGTCGGAGTCAACGGATTATTTCGAAGGCTTGCATCTTCTCTCCGCG	GTACGATCGAAATGGGTTTGCT
M6	C/A	29095781	29057225	GAAGGTGACCAAGTTCATGCTAAACCTTCTACCACAACCGGGTCC	GAAGGTCGGAGTCAACGGATTAAACCTTCTACCACAACCGGGTCA	CTGAACGTCTGAACCGGGTTGATAG
M7	C/T	29415048	29376582	GAAGGTGACCAAGTTCATGCTTGCCATTCTGTTTCGCCCATTCAC	GAAGGTCGGAGTCAACGGATTTGCCATTCTGTTTCGCCCATTCAT	AAAGCTCCGTGCCAAAGATGCA
M8	C/G	29575186	29536750	GAAGGTGACCAAGTTCATGCTGACAAATTGAGGAGCAAAGGCCTC	GAAGGTCGGAGTCAACGGATTGACAAATTGAGGAGCAAAGGCCTG	ATGGAGGCAGTGGAAGGGGTCTATAA
M26	C/T	27087431	27048395	GAAGGTGACCAAGTTCATGCTGCTTTCCCACTTTCTCCATTTTC	GAAGGTCGGAGTCAACGGATTGCTTTCCCACTTTCTCCATTTTT	AACGAAGTAGCAAAGCATGACAC
M28	G/A	27954453	27915653	GAAGGTGACCAAGTTCATGCTATCAGTTAATCCCATGTGCATTTCTTG	GAAGGTCGGAGTCAACGGATTATCAGTTAATCCCATGTGCATTTCTTA	CCCAAATTACCTATAAAACAAGGTAGG
M35	G/A	31879862	31842393	GAAGGTGACCAAGTTCATGCTCTCTACAGATGTTTGAGTCCACG	GAAGGTCGGAGTCAACGGATTCTCTACAGATGTTTGAGTCCACA	AACAACGCACAAGTCGCACACA
M40	C/T	26785291	26746190	GAAGGTGACCAAGTTCATGCTCGAGAAAATGACATTTTAATATTTTTC	GAAGGTCGGAGTCAACGGATTCGAGAAAATGACATTTTAATATTTTTT	AACCGTAAAATATTTGACTCGA
M41	T/C	26896395	26857321	GAAGGTGACCAAGTTCATGCTTTAGTCTATATAGTTCTCT	GAAGGTCGGAGTCAACGGATTTTAGTCTATATAGTTCTCC	CATAGTACATAGACGAATGGA
M46	G/C	27660324	27621460	GAAGGTGACCAAGTTCATGCTTTCAAATTCGTCGTCTTCCG	GAAGGTCGGAGTCAACGGATTTTCAAATTCGTCGTCTTCCC	TGTACCATAGCAATGACAGG
M50	T/C	25235233	25195677	GAAGGTGACCAAGTTCATGCTTAAGAGGAGGAGGAAATGAT	GAAGGTCGGAGTCAACGGATTTAAGAGGAGGAGGAAATGAC	CATTGTGAGGATAGAAAGGT
M51	C/A	25662075	25622651	GAAGGTGACCAAGTTCATGCTACTTGAAAGTGGAAGAATTC	GAAGGTCGGAGTCAACGGATTACTTGAAAGTGGAAGAATTA	TTGTATTGGCTTTCATTGAC
M52	C/T	25916033	25876717	GAAGGTGACCAAGTTCATGCTAGCTAGCCTGTGGATGCATTAAC	GAAGGTCGGAGTCAACGGATTAGCTAGCCTGTGGATGCATTAAT	ATCCACAGCGGTTCACTAACGAA
M53	C/A	26137134	26097872	GAAGGTGACCAAGTTCATGCTTACGAATTTAGTATAGACGAGCCC	GAAGGTCGGAGTCAACGGATTTACGAATTTAGTATAGACGAGCCA	TAGCACGAAACACTGATGAT
M54	T/C	26359925	26320721	GAAGGTGACCAAGTTCATGCTACTTCCTCGTCTTGCATCATT	GAAGGTCGGAGTCAACGGATTACTTCCTCGTCTTGCATCATC	CAAACAATCACGTCCTTTG
M57	C/T	28117075	28078305	GAAGGTGACCAAGTTCATGCTCATTGTTGATGGCCAATGGAAGAC	GAAGGTCGGAGTCAACGGATTCATTGTTGATGGCCAATGGAAGAT	ACTGGTGTTAACAATTGGGCGT
M58	A/T	27170081	27131065	GAAGGTGACCAAGTTCATGCTGGTCGATTGAAATATATGTCTA	GAAGGTCGGAGTCAACGGATTGGTCGATTGAAATATATGTCTT	CCTTTATATTAATAAACCACTCG
M60	C/T	27370426	27331466	GAAGGTGACCAAGTTCATGCTAAGACACTGATCGCGCCATTC	GAAGGTCGGAGTCAACGGATTAAGACACTGATCGCGCCATTT	CAAACAGGTAGGGCGCAAGTTTAGTG
M64	C/G	25701918	25662522	GAAGGTGACCAAGTTCATGCTCATTCATTTATTCTCCTCACC	GAAGGTCGGAGTCAACGGATTCATTCATTTATTCTCCTCACG	TGGATAAGAGTTAGACTCTTG
Age-related resistance (Chr3)
Marker	SNP (Gy/P)	Location (bp) (Gy 2.0)	Location (bp) (Gy v2.1)	Forward Primer 1	Forward Primer 2	Reverse Primer
ARR_M5	A/G	30519730	30523101	GAAGGTGACCAAGTTCATGCTAAGAGGGGTCATGAAGTACACCA	GAAGGTCGGAGTCAACGGATTAAGAGGGGTCATGAAGTACACCG	GTGATTAGGGTTCATGTCACATATG
ARR_M15	G/A	40141209	40147329	GAAGGTGACCAAGTTCATGCTCGATTGACAAAGATGGTGCAACAG	GAAGGTCGGAGTCAACGGATTCGATTGACAAAGATGGTGCAACAA	ACTCTCACCATCACTTCCAACGATT
Marker	SNP (P/A4-3)	Location (bp) (Gy 2.0)	Location (bp) (Gy v2.1)	Forward Primer 1	Forward Primer 2	Reverse Primer
PA_M1	C/T	30503758	30507124	GAAGGTGACCAAGTTCATGCTGATTAGCAGGCATAAAAAATGGCT	GAAGGTCGGAGTCAACGGATTGATTAGCAGGCATAAAAAATGGCC	AACTCCATTTGACCATCCTAC
PA_M5	G/C	40141244	40147364	GAAGGTGACCAAGTTCATGCTTGCAATCGTTGGAAGTGATGGTC	GAAGGTCGGAGTCAACGGATTTGCAATCGTTGGAAGTGATGGTG	ACAATTGTCGTCGGTTAACTCT
*Forward 1 primer contains FAM tail: 5'-GAAGGTGACCAAGTTCATGCT-3'
*Forward 2 primer contains HEX tail: 5'-GAAGGTCGGAGTCAACGGATT-3'

## Sheet: Table_S3
Suppemtary Table S3. Significant SNPs detected in XP-GWAS analysis. Threshold incidated the siginicance of the SNPs.
SNP ID	Chromosome	Position (bp)	P-value	Threshold
S1_322932	1	322932	4.49728e-07	FDR 0.05
S1_17249415	1	17249415	3.78995e-07	FDR 0.05
S1_17249494	1	17249494	1.39771e-06	FDR 0.05
S1_17249514	1	17249514	1.54028e-06	FDR 0.05
S1_17258761	1	17258761	1.68599e-07	FDR 0.05
S1_18181759	1	18181759	1.91447e-06	FDR 0.05
S1_18564034	1	18564034	1.55686e-06	FDR 0.05
S1_18626774	1	18626774	7.06209e-07	FDR 0.05
S1_24651967	1	24651967	9.97871e-07	FDR 0.05
S1_24748950	1	24748950	5.52221e-08	FDR 0.05
S1_24749054	1	24749054	8.78915e-10	Bonferroni 0.01
S1_24749199	1	24749199	6.57815e-07	FDR 0.05
S1_24749235	1	24749235	5.08663e-08	FDR 0.05
S1_24749256	1	24749256	1.09708e-08	Bonferroni 0.05
S1_24749269	1	24749269	1.06264e-08	Bonferroni 0.05
S1_24749284	1	24749284	6.22109e-08	FDR 0.05
S1_24749289	1	24749289	6.27079e-09	Bonferroni 0.05
S1_24749319	1	24749319	9.43364e-09	Bonferroni 0.05
S1_24749323	1	24749323	2.6226e-07	FDR 0.05
S1_24749340	1	24749340	8.63396e-09	Bonferroni 0.05
S1_24749351	1	24749351	1.49391e-08	FDR 0.05
S1_24749413	1	24749413	2.53541e-09	Bonferroni 0.01
S1_24749459	1	24749459	5.25589e-08	FDR 0.05
S1_24749475	1	24749475	8.22843e-08	FDR 0.05
S1_24749477	1	24749477	6.34674e-08	FDR 0.05
S1_24749675	1	24749675	3.3053e-10	Bonferroni 0.01
S1_24749783	1	24749783	2.25182e-07	FDR 0.05
S1_24749959	1	24749959	1.04982e-07	FDR 0.05
S1_24750375	1	24750375	6.41159e-08	FDR 0.05
S1_24750410	1	24750410	1.58657e-07	FDR 0.05
S1_24750442	1	24750442	1.06759e-07	FDR 0.05
S1_24750448	1	24750448	1.30274e-07	FDR 0.05
S1_24750518	1	24750518	2.21851e-07	FDR 0.05
S1_24750558	1	24750558	4.74092e-07	FDR 0.05
S1_24750618	1	24750618	1.13207e-07	FDR 0.05
S1_24750619	1	24750619	1.1877e-07	FDR 0.05
S1_24750636	1	24750636	9.71376e-08	FDR 0.05
S1_24750669	1	24750669	5.00343e-08	FDR 0.05
S1_24750785	1	24750785	5.18091e-07	FDR 0.05
S1_24750851	1	24750851	1.18781e-09	Bonferroni 0.01
S1_24750861	1	24750861	9.73889e-08	FDR 0.05
S1_24750869	1	24750869	6.09685e-08	FDR 0.05
S1_24750904	1	24750904	4.27532e-08	FDR 0.05
S1_24750908	1	24750908	4.84617e-08	FDR 0.05
S1_24750920	1	24750920	3.4531e-08	FDR 0.05
S1_24750927	1	24750927	6.21458e-08	FDR 0.05
S1_24750938	1	24750938	1.552e-07	FDR 0.05
S1_24750941	1	24750941	1.5087e-07	FDR 0.05
S1_24750945	1	24750945	1.53415e-07	FDR 0.05
S1_24750968	1	24750968	6.65086e-10	Bonferroni 0.01
S1_24750995	1	24750995	2.10356e-08	FDR 0.05
S1_24751010	1	24751010	1.70848e-08	FDR 0.05
S1_24751121	1	24751121	2.44819e-08	FDR 0.05
S1_24751131	1	24751131	1.34571e-09	Bonferroni 0.01
S1_24751142	1	24751142	5.35746e-08	FDR 0.05
S1_24751176	1	24751176	8.81511e-08	FDR 0.05
S1_24751178	1	24751178	1.06083e-07	FDR 0.05
S1_24751180	1	24751180	1.24624e-07	FDR 0.05
S1_24751208	1	24751208	1.84836e-07	FDR 0.05
S1_24751256	1	24751256	4.37992e-09	Bonferroni 0.05
S1_24751292	1	24751292	2.61951e-07	FDR 0.05
S1_24751299	1	24751299	3.04569e-07	FDR 0.05
S1_24751315	1	24751315	2.99645e-08	FDR 0.05
S1_24751323	1	24751323	1.73943e-08	FDR 0.05
S1_24751390	1	24751390	1.18057e-06	FDR 0.05
S1_24751400	1	24751400	7.65353e-08	FDR 0.05
S1_24751450	1	24751450	2.26199e-07	FDR 0.05
S1_24751474	1	24751474	5.81866e-10	Bonferroni 0.01
S1_24751519	1	24751519	2.14535e-10	Bonferroni 0.01
S1_24751574	1	24751574	1.04409e-10	Bonferroni 0.01
S1_24751664	1	24751664	1.88344e-09	Bonferroni 0.01
S1_24751668	1	24751668	2.16444e-08	FDR 0.05
S1_24751697	1	24751697	5.84402e-08	FDR 0.05
S1_24751768	1	24751768	5.73368e-07	FDR 0.05
S1_24751775	1	24751775	4.63111e-07	FDR 0.05
S1_24751807	1	24751807	1.00615e-06	FDR 0.05
S1_24751848	1	24751848	1.08509e-07	FDR 0.05
S1_24751913	1	24751913	2.44731e-07	FDR 0.05
S1_24752015	1	24752015	1.15047e-09	Bonferroni 0.01
S1_24752017	1	24752017	1.23885e-09	Bonferroni 0.01
S1_24752038	1	24752038	3.02675e-09	Bonferroni 0.05
S1_24752047	1	24752047	2.70388e-09	Bonferroni 0.01
S1_24752049	1	24752049	3.2087e-09	Bonferroni 0.05
S1_24752050	1	24752050	2.80803e-09	Bonferroni 0.01
S1_24752123	1	24752123	2.79064e-08	FDR 0.05
S1_24752202	1	24752202	4.10844e-07	FDR 0.05
S1_24752645	1	24752645	8.1605e-09	Bonferroni 0.05
S1_24752724	1	24752724	1.11203e-09	Bonferroni 0.01
S1_24752736	1	24752736	2.14301e-06	FDR 0.05
S1_24752886	1	24752886	6.33614e-10	Bonferroni 0.01
S1_24752922	1	24752922	7.08943e-07	FDR 0.05
S2_1641449	2	1641449	1.78606e-06	FDR 0.05
S2_1641450	2	1641450	1.67238e-06	FDR 0.05
S2_1641471	2	1641471	7.44163e-07	FDR 0.05
S2_3626444	2	3626444	1.59749e-06	FDR 0.05
S2_7095855	2	7095855	2.35073e-08	FDR 0.05
S2_7687528	2	7687528	2.91393e-07	FDR 0.05
S2_7732506	2	7732506	1.83726e-07	FDR 0.05
S2_7742628	2	7742628	4.96737e-08	FDR 0.05
S2_7753262	2	7753262	1.77507e-06	FDR 0.05
S2_7998838	2	7998838	1.10461e-06	FDR 0.05
S2_9762707	2	9762707	1.75773e-06	FDR 0.05
S2_9763635	2	9763635	1.28147e-06	FDR 0.05
S2_10300712	2	10300712	2.29894e-06	FDR 0.05
S2_10303678	2	10303678	1.12526e-06	FDR 0.05
S2_10357426	2	10357426	1.15977e-07	FDR 0.05
S2_11940045	2	11940045	2.18996e-07	FDR 0.05
S2_12147074	2	12147074	2.7885e-07	FDR 0.05
S2_12295796	2	12295796	1.5393e-06	FDR 0.05
S3_7941659	3	7941659	9.81077e-08	FDR 0.05
S3_9193157	3	9193157	2.31387e-06	FDR 0.05
S3_28247475	3	28247475	1.35588e-07	FDR 0.05
S3_28247629	3	28247629	4.22082e-07	FDR 0.05
S3_28247772	3	28247772	5.71188e-07	FDR 0.05
S3_28247823	3	28247823	2.58044e-07	FDR 0.05
S3_28248246	3	28248246	7.24216e-07	FDR 0.05
S3_35485156	3	35485156	8.2319e-08	FDR 0.05
S3_35485214	3	35485214	3.92607e-07	FDR 0.05
S3_35486044	3	35486044	1.53233e-06	FDR 0.05
S3_35486694	3	35486694	4.19767e-07	FDR 0.05
S3_35488077	3	35488077	1.29658e-06	FDR 0.05
S3_35488148	3	35488148	5.79836e-07	FDR 0.05
S3_35488226	3	35488226	8.48158e-07	FDR 0.05
S3_35488468	3	35488468	1.07695e-07	FDR 0.05
S3_35545723	3	35545723	2.2519e-06	FDR 0.05
S3_39287982	3	39287982	1.45844e-06	FDR 0.05
S3_39292099	3	39292099	7.73723e-08	FDR 0.05
S4_335874	4	335874	2.1816e-07	FDR 0.05
S4_2436457	4	2436457	2.0625e-06	FDR 0.05
S4_4546294	4	4546294	7.51654e-07	FDR 0.05
S4_20061875	4	20061875	5.03125e-07	FDR 0.05
S4_20860457	4	20860457	2.31343e-06	FDR 0.05
S4_20860604	4	20860604	2.06833e-06	FDR 0.05
S4_20861074	4	20861074	1.49452e-06	FDR 0.05
S4_20861094	4	20861094	1.12146e-06	FDR 0.05
S4_20861148	4	20861148	9.40767e-07	FDR 0.05
S4_20861149	4	20861149	8.90911e-07	FDR 0.05
S5_17029698	5	17029698	5.71569e-07	FDR 0.05
S5_22208752	5	22208752	7.40558e-08	FDR 0.05
S5_22833469	5	22833469	2.27046e-07	FDR 0.05
S5_23323814	5	23323814	8.39928e-07	FDR 0.05
S5_24839911	5	24839911	1.77682e-06	FDR 0.05
S5_28909866	5	28909866	9.15963e-08	FDR 0.05
S5_28909926	5	28909926	1.90803e-08	FDR 0.05
S5_28910012	5	28910012	6.87562e-08	FDR 0.05
S5_28911057	5	28911057	1.12681e-06	FDR 0.05
S5_28911597	5	28911597	4.50661e-07	FDR 0.05
S5_28911624	5	28911624	1.81378e-07	FDR 0.05
S5_28911675	5	28911675	1.6754e-08	FDR 0.05
S5_28911735	5	28911735	7.3536e-08	FDR 0.05
S5_28911790	5	28911790	6.1353e-08	FDR 0.05
S5_28912461	5	28912461	4.77183e-09	Bonferroni 0.05
S5_28912742	5	28912742	6.98407e-07	FDR 0.05
S5_28913070	5	28913070	8.04333e-08	FDR 0.05
S6_1808447	6	1808447	6.67739e-07	FDR 0.05
S6_6641666	6	6641666	1.60925e-06	FDR 0.05
S6_22168224	6	22168224	1.53853e-06	FDR 0.05
S6_22169998	6	22169998	1.87713e-06	FDR 0.05
S6_24591076	6	24591076	2.16804e-06	FDR 0.05
S6_24591089	6	24591089	1.76391e-06	FDR 0.05
S6_26244965	6	26244965	1.30325e-06	FDR 0.05
S6_28994310	6	28994310	8.09156e-07	FDR 0.05
S7_308634	7	308634	2.26024e-06	FDR 0.05
S7_383806	7	383806	4.78191e-07	FDR 0.05
S7_17080766	7	17080766	2.13197e-06	FDR 0.05

## Sheet: Table_S4
Suppemtary Table S4. Genes within the locus identified as differentially expressed uniquely in resistant-aged `Poinsett 76’ fruit at qPARR3.1.
			Mean read counts QTL-seq 'Gy14', 'Poinsett 76' at 8 and 16 dpp
Diff. Exp.a	Gene id		Gy 8b	Gy 16	P 8	P 16	Annotation
	ChineseLong v2	Gy14v2.1c
Up	Csa3G821040	CsGy3G035340	8.02021	6.13637	5.04776	31.2293	Unknown protein
	Csa3G836520	CsGy3G037440	16.8386	33.9718	31.1863	71.5897	Carbonic anhydrase; contains IPR001765 (Carbonic anhydrase)
	Csa3G872720	CsGy3G041010	66.6143	119.416	129.432	342.494	U-box domain-containing protein; contains IPR013083 (Zinc finger, RING/FYVE/PHD-type), IPR015943 (WD40/YVTN repeat-like-containing domain), IPR016024 (Armadillo-type fold)
	Csa3G881910	CsGy3G042190	9.33938	26.9188	10.1835	120.718	Cyclic nucleotide-gated channel; contains IPR005821 (Ion transport domain), IPR014710 (RmlC-like jelly roll fold)
Down	Csa3G792050	CsGy3G033580	209.274	135.9	632.215	51.3229	Strigolactone esterase D14-like
	Csa3G814380	unannotated	67.0163	62.9375	58.4647	24.8666	Unknown protein
	Csa3G820500	CsGy3G035300	83.5513	10.6477	12.5507	0.290009	Amino acid transporter, putative; contains IPR013057 (Amino acid transporter, transmembrane)
	Csa3G821590	CsGy3G035390	279.787	235.375	416.376	98.0593	Strictosidine synthase, putative; contains IPR011042 (Six-bladed beta-propeller, TolB-like)
	Csa3G822520	CsGy3G035910	11.1819	4.97901	6.33293	0	Acid phosphatase, putative; contains IPR011230 (Phosphoesterase At2g46880); Metallophos domain-containing protein
	Csa3G851720	CsGy3G039310	25.3888	13.8324	12.1898	0.595739	Dynein light chain; contains IPR001372 (Dynein light chain, type 1/2)
	Csa3G852590	CsGy3G039720	65.9211	37.1505	33.213	2.28266	Cytochrome P450; contains IPR001128 (Cytochrome P450)
	Csa3G852640	CsGy3G039820	44.6436	44.2328	10.5176	2.62971	Cytochrome P450, putative; contains IPR001128 (Cytochrome P450)
	Csa3G857030	CsGy3G040260	88.972	95.6061	353.377	22.3769	Myb family transcription factor; contains IPR009057 (Homeodomain-like); protein RADIALIS-like 3
	Csa3G859730	CsGy3G040490	237.583	507.243	278.068	25.4672	N-methyltransferase; contains IPR005299 (SAM dependent carboxyl methyltransferase); jasmonate O-methyltransferase
	Csa3G882940	CsGy3G042300	9.1793	17.7299	16.4801	7.12813	Receptor-like protein kinase; contains IPR011009 (Protein kinase-like domain); pollen receptor-like kinase 2
	Csa3G902380	CsGy3G044210	604.649	1048.39	1116.54	457.592	Unknown protein
	Csa3G914590	CsGy3G044963	102.972	117.889	164.365	46.6442	Ubiquitin ligase protein cop1, putative; contains IPR015943 (WD40/YVTN repeat-like-containing domain)
a Diff. Exp. – Direction of differential expression of resistant age 16dpp Poinsett relative to susceptible 8dpp Poinsett and 8 and 16dpp Gy14
b Each value is the mean of three biological replications.
c the original gene annotation was performed using Chinese Long v. 2 (prior to availability of the Gy14 2.1 assembly); the anotation in Gy14 v. 2.1 was assigned by blasting sequence of the anotated gene from Chinese Long onto Gy14v. 2.1

## Sheet: Table_S5
Suppemtary Table S5. Polymorphisms detected starting from 2 kb upstream of Csa3G872720 until the end of its 3’UTR in four genotypes: ‘Chinese Long 9930’ (ARR-, the reference genome), ‘Gy 14’ (ARR-), ‘Poinsett 76’ (ARR+) and ‘Vlaspik’ (ARR+)
Asterisks denote long insertions and deletions which follow the table. REF – Reference allele, ALT – Alternate allele, DP – Depth.
Position	Feature	Mutation	REF	ALT	Gy 14	Gy 14	Poinsett 76	Poinsett 76	Vlaspik	Vlaspik
					REF DP	ALT DP	REF DP	ALT DP	REF DP	ALT DP
36453680	3'UTR	G	C	13	0	0	14	6	10
36453794	3'UTR	*	9	0	0	12	10	10
36454012	3'UTR	AAT	A	22	0	0	11	8	8
36454508	Intron	T	A	18	0	0	11	4	12
36454567	Intron	C	G	17	0	0	14	5	6
36454772	Intron	T	C	22	0	0	20	6	7
36455388	Intron	T	**	14	0	0	13	8	9
36455390	Intron	T	TAAAC	15	0	0	16	8	10
36455793	Splice site	A	***	0	22	0	8	0	16
36457256	Splice site	C	CTT	22	0	0	3	5	9
36457664	Exon	Gly → Glu	C	T	19	0	0	14	6	9
36457697	Exon	Arg → Ser	C	G	18	0	0	13	8	11
36458130	Exon	Asn → Asp	T	C	13	0	0	14	10	6
36458168	Exon	Asn → Ser	T	C	18	0	0	20	10	6
36458532	Exon	Gly → Ser	C	T	20	0	0	19	5	3
36459307	Intron	C	T	15	0	0	11	4	10
36460324	Exon	A	G	16	0	0	19	5	6
36461336	Upstream	A	G	15	0	0	13	7	5
36461599	Upstream	A	T	12	0	0	9	4	11
36462010	Upstream	T	G	20	0	0	16	3	10
36462027	Upstream	A	G	17	0	0	16	5	10
* GTTCAGACTTACCACAAGTTATGGAAATACATGGATGAGTGTTTTTTGATAACCGTATGC
** TCGAAGAAACCA
*** AATGGACAAAAGATAGAACAGTAGTAAGCTCCATCAC
